# Supplementary material for: Wound Healing Effect of Gintonin Involves Lysophosphatidic Acid Receptor/Vascular Endothelial Growth Factor Signaling Pathway in Keratinocytes
Source: MDPI journal article supplement (doi:10.3390/ijms221810155), 2021-09-21
Supplement: s1 [file s1]

Supplementary data

# Wound healing effect of gintonin involves lysophosphatidic acid receptor/vascular endothelial growth factor signaling pathway in keratinocytes

Sun-Hye Choi<sup>1,†</sup>, Kyung-Jong Won<sup>2,†</sup>, Rami Lee<sup>1</sup>, Han-Sung Cho<sup>1</sup>, Sung-Hee Hwang<sup>3,\*</sup> and Seung-Yeol Nah<sup>1,\*</sup>

<sup>1</sup> Ginsentology Research Laboratory and Department of Physiology, College of Veterinary Medicine, Konkuk University, Seoul 05029, Republic of Korea; vettman@naver.com (S.-H.C.), rmllee12@konkuk.ac.kr (R.L.), earth02@konkuk.ac.kr (H.-S.C), syn-ah@konkuk.ac.kr (S.-Y.N)

<sup>2</sup> Department of Physiology and Medical Science, School of Medicine, Konkuk University, Seoul 05029, Republic of Korea; kjwon@kku.ac.kr (K.-J.W.)

<sup>3</sup> Department of Pharmaceutical Engineering, College of Health Sciences, Sangji University, Wonju, 26339, Republic of Korea; sunghhwang@sangji.ac.kr (S.-H.H)

\* Correspondence: synah@konkuk.ac.kr (S.-Y.N), sunghhwang@sangji.ac.kr (S.-H.H); Tel.: +82-2-450-4154 (S.-Y.N), +82-33-738-7922 (S.-H.H)

<sup>†</sup> These authors contributed equally to this work.

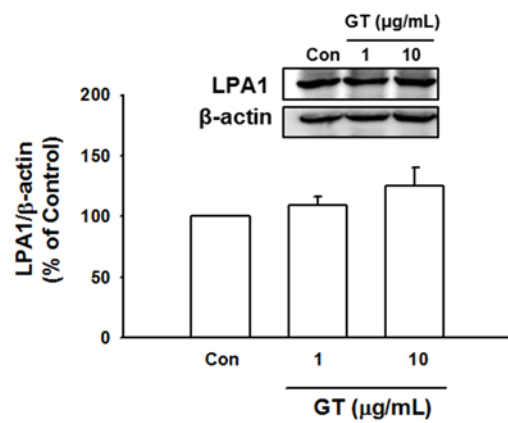

(a)

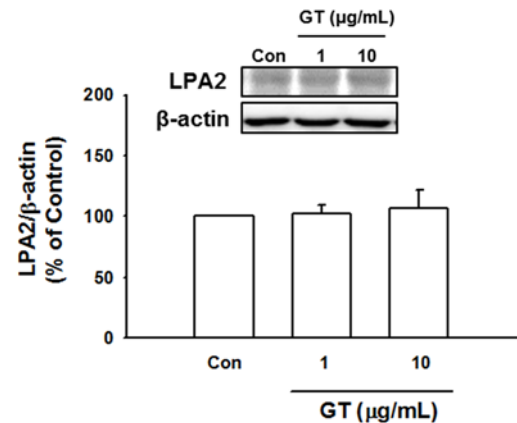

(b)

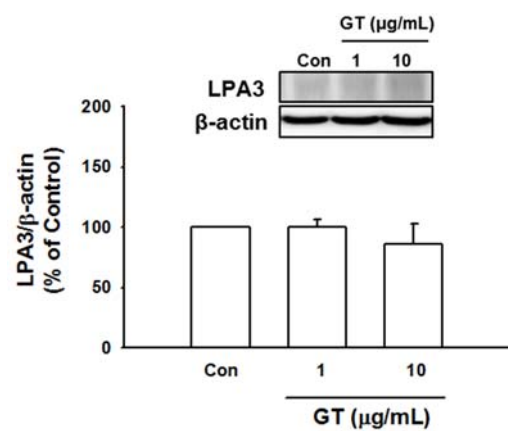

(c)

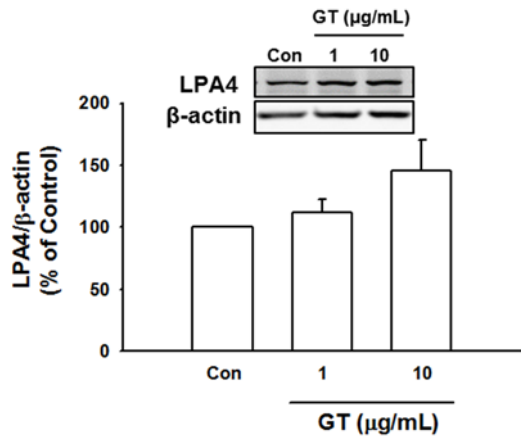

(d)

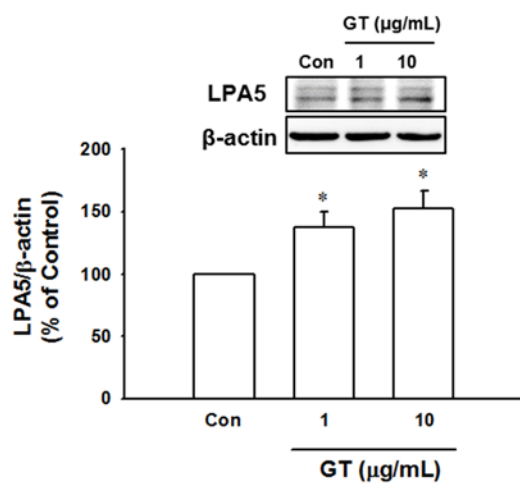

(e)

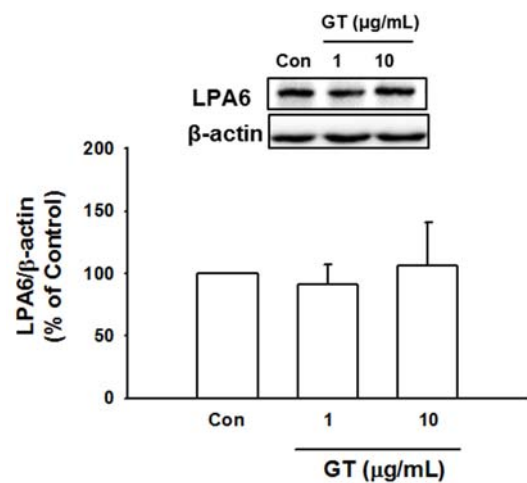

(f)

**Figure S1.** Expression of lysophosphatidic acid (LPA) receptor subtypes in HaCaT cells. Cells were incubated in serum-free medium with gintonin (GT, 1 or 10 μg/mL) for 6 h. Then, the cell lysates were analyzed by immunoblotting, using LPA receptor subtypes LPA1-6 antibodies as described in the Materials and Methods section of the main text. Response in untreated cell (Con) was considered as 100%. Data represent means ± S.E.M. ( $n = 6$ ); \* $p < 0.05$ , vs. untreated cells.

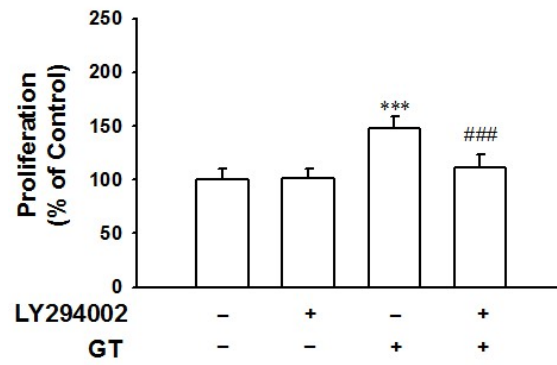

**Figure S2.** Effect of PI3K inhibitor LY294002 on gintonin-induced proliferation of HaCaT cells. Cells were incubated in serum-free medium with gintonin (GT, 10  $\mu$ g/mL) in the presence or absence of inhibitor for 24 h. Then, XTT-based assay was performed. LY294002 (25  $\mu$ M). Response in untreated cell was considered as 100%. Data represent means  $\pm$  S.E.M. ( $n = 6$ ); \*\*\* $p < 0.001$ , vs. untreated cells; ### $p < 0.001$ , vs. GT alone.
